# Supplementary material for: Escherichia coli Affects Expression of Circadian Clock Genes in Human Hepatoma Cells
Source: MDPI journal article supplement (doi:10.3390/microorganisms9040869), 2021-04-17
Supplement: s1 [file s1]

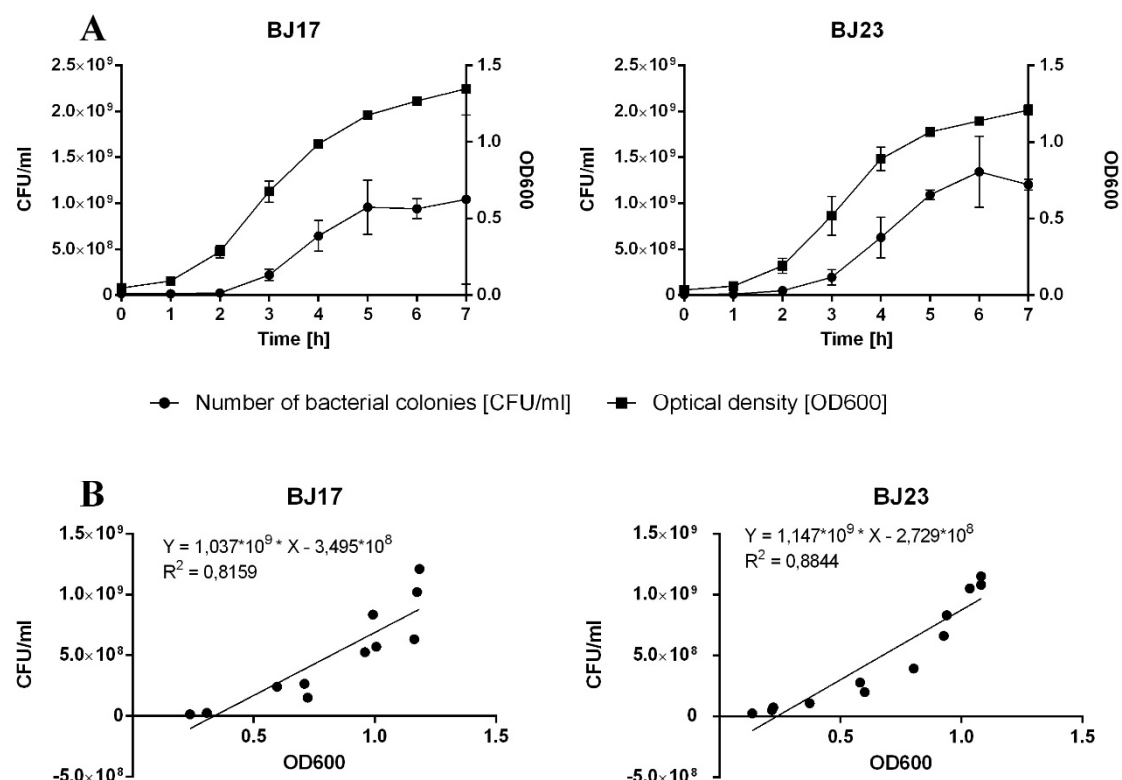

**Figure S1.** Growth characteristics of bacterial strains BJ17 and BJ23. (A) Bacterial growth curves. (B) Linear regression analysis of exponential phase data (2–5 hours). Data are represented as mean  $\pm$  SD of three separate experiments.

**Table S1.** Estimation of circadian behaviour of core clock gene expression in HepG2 cells (K) and in co-culture with *E. coli* strains BJ17 and BJ23, related to Figure 2.

| Gene                | Circadian expression, adjusted p-value | Amplitude (a.u.) | Phase (radians) | Phase (hours) |
|---------------------|----------------------------------------|------------------|-----------------|---------------|
| <i>CLOCK</i> , K    | 5.40E-01                               | 1.33E-02         | -3.75           | 14.31         |
| <i>CLOCK</i> , BJ17 | 6.28E-03                               | 5.51E-02         | -3.80           | 14.51         |
| <i>CLOCK</i> , BJ23 | 1.77E-03                               | 7.41E-02         | -4.24           | 16.21         |
| <i>BMAL1</i> , K    | 1.67E-01                               | 1.94E-02         | -4.26           | 16.26         |
| <i>BMAL1</i> , BJ17 | 3.19E-08                               | 4.33E-02         | -4.37           | 16.70         |
| <i>BMAL1</i> , BJ23 | 1.92E-03                               | 7.61E-02         | -4.48           | 17.12         |
| <i>PER1</i> , K     | 4.36E-05                               | 1.29E-01         | -4.87           | 18.59         |
| <i>PER1</i> , BJ17  | 4.47E-07                               | 5.04E-04         | -1.68           | 6.42          |
| <i>PER1</i> , BJ23  | 3.60E-02                               | 4.32E-02         | -4.82           | 18.40         |
| <i>PER2</i> , K     | 3.40E-04                               | 3.62E-02         | -2.03           | 7.76          |
| <i>PER2</i> , BJ17  | 6.83E-17                               | 7.43E-02         | -1.46           | 5.56          |
| <i>PER2</i> , BJ23  | 8.70E-04                               | 7.81E-02         | -1.08           | 4.14          |
| <i>PER3</i> , K     | 4.21E-03                               | 1.47E-02         | -2.49           | 9.52          |
| <i>PER3</i> , BJ17  | 9.26E-09                               | 2.21E-02         | -1.39           | 5.29          |
| <i>PER3</i> , BJ23  | 7.25E-03                               | 2.26E-02         | -1.61           | 6.15          |
| <i>CRY1</i> , K     | 6.56E-03                               | 2.23E-02         | -2.83           | 10.80         |
| <i>CRY1</i> , BJ17  | 2.94E-01                               | 5.84E-03         | -0.53           | 2.04          |
| <i>CRY1</i> , BJ23  | 2.65E-01                               | 2.89E-02         | -0.99           | 3.77          |
| <i>CRY2</i> , K     | 4.50E-11                               | 9.54E-02         | -2.20           | 8.41          |
| <i>CRY2</i> , BJ17  | 5.22E-09                               | 6.95E-02         | -1.71           | 6.51          |
| <i>CRY2</i> , BJ23  | 1.92E-03                               | 4.99E-02         | -1.82           | 6.95          |

**Table S2–S22:** Relative mRNA expression of circadian behaviour of core clock genes in HepG2 cells (K) and in co-culture with *E. coli* strains BJ17 and BJ23, related to Figure 2 - **raw data**

**Table S2:** Relative mRNA expression *clock* – incubation with no bacteria, control

| <i>clock</i><br>control | Well A         |                |                | Well B         |                |                |
|-------------------------|----------------|----------------|----------------|----------------|----------------|----------------|
| hours                   | Replicate<br>1 | Replicate<br>2 | Replicate<br>3 | Replicate<br>1 | Replicate<br>2 | Replicate<br>3 |
| 2                       | 0.422387       | 0.392902       | 0.403362       | 0.467188       | 0.448236       | 0.472457       |
| 4                       | 0.381177       | 0.332871       | 0.316761       | 0.530632       | 0.33194        | 0.314997       |
| 6                       | 0.459566       | 0.383735       | 0.324546       | 0.395601       | 0.384138       | 0.485194       |
| 8                       | 0.50418        | 0.523615       | 0.564894       | 0.32261        | 0.338598       | 0.312307       |
| 10                      | 0.504216       | 0.784092       | 0.517656       | 0.359779       | 0.390347       | 0.423207       |
| 12                      | 0.510947       | 0.415249       | 0.46425        | 0.285852       | 0.286283       | 0.297331       |
| 14                      | 0.389164       | 0.450306       | 0.440493       | 0.421263       | 0.39702        | 0.384592       |
| 16                      | 0.294027       | 0.236633       | 0.011974       | 0.39684        | 0.380492       | 0.401375       |
| 18                      | 0.760898       | 0.742336       | 0.74813        | 1.048965       | 1.031132       | 1.036322       |
| 20                      | 0.431211       | 0.473302       | 0.459587       | 0.370522       | 0.404622       | 0.380145       |
| 22                      | 0.398001       | 0.386877       | 0.367508       | 0.447372       | 0.384023       | 0.428886       |
| 24                      | 0.292984       | 0.264447       | 0.266075       |                |                |                |

**Table S3:** Relative mRNA expression *clock* – incubation with strain *E. coli*, strain B17

| <i>clock</i><br>BJ17 | Well A         |                |                | Well B         |                |                |
|----------------------|----------------|----------------|----------------|----------------|----------------|----------------|
| hours                | Replicate<br>1 | Replicate<br>2 | Replicate<br>3 | Replicate<br>1 | Replicate<br>2 | Replicate<br>3 |
| 2                    | 0.330071       | 0.312991       | 0.336311       | 0.937829       | 0.919272       | 0.932068       |
| 4                    | 0.350724       | 0.327735       | 0.323544       | 0.561455       | 0.581052       | 0.550565       |
| 6                    | 0.381095       | 0.365654       | 0.352533       | 0.360854       | 0.360606       | 0.446238       |
| 8                    | 0.465115       | 0.463896       | 0.422587       | 0.334184       | 0.320155       | 0.444272       |
| 10                   | 0.354569       | 0.294676       | 0.36583        | 0.328063       | 0.351295       | 0.376766       |
| 12                   | 0.399603       | 0.362115       | 0.31383        | 0.402698       | 0.406325       | 0.374412       |
| 14                   | 0.409758       | 0.347361       | 0.342919       | 0.297706       | 0.318788       | 0.334457       |
| 16                   | 0.623037       | 0.667107       | 0.618386       | 0.58969        | 0.633238       | 0.549457       |
| 18                   | 0.389792       | 0.415993       | 0.41762        | 0.346656       | 0.406878       | 0.378271       |
| 20                   | 0.406053       | 0.382998       | 0.406604       | 0.555531       | 0.574475       | 0.516665       |
| 22                   | 0.355837       | 0.302223       | 0.394123       | 0.272366       | 0.264955       | 0.264261       |
| 24                   | 0.30915        | 0.250274       | 0.292259       | 0.281921       | 0.038956       | 0.069123       |

**Table S4:** Relative mRNA expression *clock* – incubation with strain *E. coli*, strain B23

| <i>clock</i><br>BJ23 | Well A         |                |                | Well B         |                |                |
|----------------------|----------------|----------------|----------------|----------------|----------------|----------------|
| hours                | Replicate<br>1 | Replicate<br>2 | Replicate<br>3 | Replicate<br>1 | Replicate<br>2 | Replicate<br>3 |
| 2                    | 0.409358       | 0.398961       | 0.374119       | 0.397753       | 0.393862       | 0.376401       |
| 4                    | 5.101115       | 7.977533       | 6.394679       | 0.418145       | 0.483566       | 0.436411       |
| 6                    | 0.417124       | 0.445028       | 0.485181       | 0.302744       | 0.298944       | 0.323309       |
| 8                    | 0.458038       | 0.502327       | 0.496864       | 0.456736       | 0.395534       | 0.305599       |
| 10                   | 0.386975       | 0.358505       | 0.384715       | 0.279568       | 0.268195       | 0.2612         |
| 12                   | 0.448449       | 0.529643       | 0.560222       | 0.418286       | 0.488682       | 0.434331       |
| 14                   | 0.391689       | 0.357447       | 0.405377       | 0.372622       | 0.387153       | 0.417929       |
| 16                   | 0.465656       | 0.519313       | 0.397148       | 0.81128        | 0.805247       | 0.217799       |
| 18                   | 0.48845        | 0.494409       | 0.467241       | 0.643749       | 0.687552       | 0.597383       |
| 20                   |                |                |                | 0.617927       | 0.652642       | 0.696549       |
| 22                   | 0.281186       | 0.251857       | 0.265803       | 0.333458       | 0.314932       | 0.333293       |
| 24                   | 0.246896       | 0.202334       | 0.233399       |                |                |                |

Table S5: Relative mRNA expression *bmal1* – incubation with no bacteria, control

| <i>bmal1</i><br>control | Well A      |             |             | Well B      |             |             |
|-------------------------|-------------|-------------|-------------|-------------|-------------|-------------|
| hours                   | Replicate 1 | Replicate 2 | Replicate 3 | Replicate 1 | Replicate 2 | Replicate 3 |
| 2                       | 0.094991    | 0.131731    | 0.1873      | 0.215675    | 0.236206    | 0.2234314   |
| 4                       | 0.229104    | 0.104196    | 0.179242    | 0.111805    | 0.135622    | 0.1225783   |
| 6                       | 0.092877    | 0.143653    | 0.15826     | 0.193018    | 0.162103    | 0.1419226   |
| 8                       | 0.196833    | 0.182356    | 0.152699    | 0.126787    | 0.138904    | 0.1242372   |
| 10                      | 0.182859    | 0.306266    | 0.271342    | 0.278802    | 0.197173    | 0.318717    |
| 12                      | 0.214524    | 0.215092    | 0.180132    | 0.12253     | 0.102999    | 0.106997    |
| 14                      | 0.170558    | 0.150628    | 0.137802    | 0.187312    | 0.223365    | 0.1963989   |
| 16                      | 0.039754    | 0.034957    | 0.087974    | 0.136169    | 0.122115    | 0.0975869   |
| 18                      | 0.334136    | 0.528552    | 0.433717    | 0.461528    | 0.598941    | 0.5912051   |
| 20                      | 0.167313    | 0.224408    | 0.245873    | 0.228349    | 0.237817    | 0.170194    |
| 22                      | 0.118215    | 0.138587    | 0.202067    | 0.165929    | 0.21327     | 0.1762547   |
| 24                      | 0.139732    | 0.127649    | 0.108448    | 0.114207    | 0.099778    | 0.1353093   |

Table S6: Relative mRNA expression *bmal1* – incubation with strain *E. coli*, strain B17

| <i>bmal1</i> BJ17 | Well A      |             |             | Well B      |             |             |
|-------------------|-------------|-------------|-------------|-------------|-------------|-------------|
| hours             | Replicate 1 | Replicate 2 | Replicate 3 | Replicate 1 | Replicate 2 | Replicate 3 |
| 2                 | 0.172281    | 0.180982    | 0.183183    | 0.112157    | 0.095163    | 0.100034    |
| 4                 | 0.137851    | 0.129667    | 0.135157    | 0.152739    | 0.1094      | 0.114819    |
| 6                 | 0.097885    | 0.110564    | 0.097901    | 0.138959    | 0.140529    | 0.094102    |
| 8                 | 0.207355    | 0.175667    | 0.134189    | 0.157159    | 0.194       | 0.236381    |
| 10                | 0.143606    | 0.144589    | 0.146259    | 0.250215    | 0.194632    | 0.200252    |
| 12                | 0.236476    | 0.139399    | 0.216863    | 0.191438    | 0.148943    | 0.131496    |
| 14                | 0.237434    | 0.19977     | 0.1984      | 0.168952    | 0.190003    | 0.127519    |
| 16                | 0.206604    | 0.197352    | 0.197727    | 0.171713    | 0.248062    | 0.137464    |
| 18                | 0.269173    | 0.275548    | 0.258878    | 0.344007    | 0.341382    | 0.391901    |
| 20                | 0.159083    | 0.201673    | 0.152717    | 0.220195    | 0.210558    | 0.238045    |
| 22                | 0.163982    | 0.122528    | 0.194323    | 0.155915    | 0.134428    | 0.126206    |
| 24                | 0.151058    | 0.158353    | 0.211478    | 0.221658    | 0.16641     | 0.183022    |

Table S7: Relative mRNA expression *bmal1* – incubation with strain *E. coli*, strain B23

| <i>bmal1</i> BJ23 | Well A      |             |             | Well B      |             |             |
|-------------------|-------------|-------------|-------------|-------------|-------------|-------------|
| hours             | Replicate 1 | Replicate 2 | Replicate 3 | Replicate 1 | Replicate 2 | Replicate 3 |
| 2                 | 0.157126    | 0.248348    | 0.19184     | 0.144265    | 0.153817    | 0.184905    |
| 4                 | 1.387434    | 1.823275    | 1.017193    | 0.130479    | 0.150943    | 0.137079    |
| 6                 | 0.088436    | 0.132437    | 0.126516    | 0.122031    | 0.115521    | 0.13119     |
| 8                 | 0.130455    | 0.113814    | 0.152266    | 0.271343    | 0.249294    | 0.179769    |
| 10                | 0.140608    | 0.12404     | 0.172665    | 0.114261    | 0.14825     | 0.143474    |
| 12                | 0.255717    | 0.255407    | 0.251352    | 0.149649    | 0.161856    | 0.155424    |
| 14                | 0.171165    | 0.214971    | 0.213692    | 0.322502    | 0.188792    | 0.279216    |
| 16                | 0.315369    | 0.319591    | 0.255912    | 0.276875    | 0.470233    | 0.353451    |
| 18                | 0.303199    | 0.301418    | 0.369181    | 0.517213    | 0.490001    | 0.500535    |
| 20                | 0.116948    | 0.144515    | 0.241527    | 0.406596    | 0.371704    | 0.424165    |
| 22                | 0.1465      | 0.102355    | 0.133532    | 0.109508    | 0.171946    | 0.166292    |
| 24                | 0.122598    | 0.10717     | 0.106435    | 0.096113    | 0.137795    | 0.143457    |

Table S8: Relative mRNA expression *per1* – incubation with no bacteria, control

| <i>per1</i><br>control | Well A         |                |                | Well B         |                |                |
|------------------------|----------------|----------------|----------------|----------------|----------------|----------------|
| hours                  | Replicate<br>1 | Replicate<br>2 | Replicate<br>3 | Replicate<br>1 | Replicate<br>2 | Replicate<br>3 |
| 2                      | 0.002602       | 0.001808       | 0.002391       | 0.002063       | 0.002222       | 0.002645       |
| 4                      | 0.002599       | 0.002056       | 0.001848       | 0.002029       | 0.001942       | 0.001506       |
| 6                      | 0.0021         | 0.001509       | 0.001658       | 0.002846       | 0.001873       | 0.001706       |
| 8                      | 0.002846       | 0.002024       | 0.002495       | 0.002406       | 0.002099       | 0.002216       |
| 10                     | 0.002059       | 0.002391       | 0.00191        | 0.001776       | 0.002142       | 0.00274        |
| 12                     | 0.001863       | 0.001992       | 0.001491       | 0.001649       | 0.00144        | 0.001115       |
| 14                     | 0.003176       | 0.002177       | 0.002152       | 0.002374       | 0.001739       | 0.001956       |
| 16                     |                |                |                | 0.00141        | 0.001483       | 0.001146       |
| 18                     | 0.636065       | 0.623937       | 0.632584       | 1.076395       | 1.090551       | 1.089791       |
| 20                     | 0.655219       | 0.641832       | 0.642699       | 0.001117       | 0.001022       | 0.001685       |
| 22                     | 0.00192        | 0.001314       | 0.001589       | 0.001426       | 0.001136       | 0.001308       |
| 24                     | 0.001229       | 0.001322       | 0.001131       | 0.001107       | 0.00112        | 0.002394       |

Table S9: Relative mRNA expression *per1* – incubation with *E. coli*, strain BJ17

| <i>per1</i><br>BJ17 | Well A         |                |                | Well B         |                |                |
|---------------------|----------------|----------------|----------------|----------------|----------------|----------------|
| hours               | Replicate<br>1 | Replicate<br>2 | Replicate<br>3 | Replicate<br>1 | Replicate<br>2 | Replicate<br>3 |
| 2                   | 0.001499       | 0.001712       | 0.001629       | 0.001934       | 0.001586       | 0.0015         |
| 4                   | 0.002309       | 0.002191       | 0.002122       | 0.002021       | 0.001995       | 0.001749       |
| 6                   | 0.001779       | 0.001497       | 0.001552       | 0.003667       | 0.003211       | 0.003502       |
| 8                   | 0.001394       | 0.001443       | 0.001326       | 0.003383       | 0.002749       | 0.003051       |
| 10                  | 0.001694       | 0.001762       | 0.002264       | 0.001398       | 0.00187        | 0.001445       |
| 12                  | 0.001828       | 0.001628       | 0.001837       | 0.00144        | 0.001297       | 0.001127       |
| 14                  | 0.001766       | 0.001994       | 0.001458       | 0.001657       | 0.001412       | 0.001093       |
| 16                  | 0.001206       | 0.001129       | 0.001152       | 0.001547       | 0.001644       | 0.001822       |
| 18                  | 0.615333       | 0.607345       | 0.614048       | 0.561111       | 0.559963       | 0.563045       |
| 20                  | 0.001203       | 0.001464       | 0.001275       | 0.001239       | 0.001259       | 0.001208       |
| 22                  | 0.001976       | 0.001426       | 0.001376       | 0.00099        | 0.000872       | 0.001109       |
| 24                  | 0.000955       | 0.001175       | 0.001109       | 0.001987       | 0.002208       | 0.002561       |

Table S10: Relative mRNA expression *per1* – incubation with *E. coli*, strain BJ23

| <i>per1</i><br>BJ23 | Well A         |                |                | Well B         |                |                |
|---------------------|----------------|----------------|----------------|----------------|----------------|----------------|
| hours               | Replicate<br>1 | Replicate<br>2 | Replicate<br>3 | Replicate<br>1 | Replicate<br>2 | Replicate<br>3 |
| 2                   | 0.003864       | 0.003162       | 0.002626       |                |                |                |
| 4                   | 0.030303       | 0.044513       | 0.030729       | 0.001659       | 0.001224       | 0.0016         |
| 6                   | 0.002536       | 0.001948       | 0.002228       | 0.00135        | 0.001326       | 0.001511       |
| 8                   | 0.002002       | 0.002151       | 0.002207       | 0.002243       | 0.001835       | 0.002157       |
| 10                  | 0.001685       | 0.002474       | 0.001622       | 0.00167        | 0.001253       | 0.001242       |
| 12                  | 0.002027       | 0.001927       | 0.001692       | 0.002481       | 0.002389       | 0.002233       |
| 14                  | 0.001919       | 0.001776       | 0.001891       | 0.001366       | 0.001386       | 0.000887       |
| 16                  | 0.000728       | 0.000842       | 0.000944       | 0.002286       | 0.001279       | 0.001853       |
| 18                  | 0.614476       | 0.606922       | 0.612792       | 0.660889       | 0.670456       | 0.689618       |
| 20                  |                |                |                | 0.001145       | 0.000745       | 0.001373       |
| 22                  | 0.000949       | 0.001022       | 0.00133        | 0.001207       | 0.001488       | 0.001071       |
| 24                  | 0.001148       | 0.001259       | 0.001089       | 0.001254       | 0.00169        | 0.002302       |

Table S11: Relative mRNA expression *per2* – incubation with no bacteria, control

| <i>per2</i><br>control | Well A         |                |                | Well B         |                |                |
|------------------------|----------------|----------------|----------------|----------------|----------------|----------------|
| hours                  | Replicate<br>1 | Replicate<br>2 | Replicate<br>3 | Replicate<br>1 | Replicate<br>2 | Replicate<br>3 |
| 2                      | 0.350412       | 0.257638       | 0.287659       | 0.34555        | 0.354106       | 0.332937       |
| 4                      | 0.216976       | 0.244292       | 0.197439       | 0.276782       | 0.251205       | 0.245602       |
| 6                      | 0.231317       | 0.19433        | 0.189717       | 0.379789       | 0.307602       | 0.34712        |
| 8                      | 0.174424       | 0.203311       | 0.167187       | 0.416969       | 0.363088       | 0.408583       |
| 10                     | 0.232861       | 0.29715        | 0.327248       | 0.330204       | 0.327571       | 0.291097       |
| 12                     | 0.319664       | 0.28061        | 0.265192       | 0.21108        | 0.247392       | 0.219628       |
| 14                     | 0.243623       | 0.241334       | 0.261489       | 0.330575       | 0.267762       | 0.265683       |
| 16                     | 0.288553       | 0.298702       | 0.119009       | 0.233162       | 0.19803        | 0.179666       |
| 18                     | 0.195138       | 0.229565       | 0.191822       | 0.27117        | 0.240482       | 0.216805       |
| 20                     | 0.213064       | 0.213817       | 0.190757       | 0.256132       | 0.230738       | 0.246059       |
| 22                     | 0.222971       | 0.17123        | 0.1868         | 0.24281        | 0.248052       | 0.191816       |
| 24                     | 0.214604       | 0.207004       | 0.239349       | 0.153566       | 0.235352       | 0.244641       |

Table S12: Relative mRNA expression *per2* – incubation with *E. coli*, strain BJ17

| <i>per2</i><br>BJ17 | Well A         |                |                | Well B         |                |                |
|---------------------|----------------|----------------|----------------|----------------|----------------|----------------|
| hours               | Replicate<br>1 | Replicate<br>2 | Replicate<br>3 | Replicate<br>1 | Replicate<br>2 | Replicate<br>3 |
| 2                   | 0.237322       | 0.246313       | 0.234688       | 0.389471       | 0.251775       | 0.371249       |
| 4                   | 0.421644       | 0.371104       | 0.33866        | 0.34535        | 0.285966       | 0.311213       |
| 6                   | 0.310454       | 0.29968        | 0.268584       | 0.341931       | 0.337536       | 0.349235       |
| 8                   | 0.30527        | 0.26335        | 0.30158        | 0.433769       | 0.433373       | 0.412161       |
| 10                  | 0.313138       | 0.235896       | 0.264438       | 0.244239       | 0.219636       | 0.235743       |
| 12                  | 0.239351       | 0.228807       | 0.202916       | 0.203364       | 0.215336       | 0.211957       |
| 14                  | 0.149996       | 0.218724       | 0.155798       | 0.187232       | 0.164351       | 0.206793       |
| 16                  | 0.200455       | 0.346195       | 0.244301       | 0.222667       | 0.232108       | 0.225631       |
| 18                  | 0.183945       | 0.186039       | 0.218579       | 0.174832       | 0.16531        | 0.163163       |
| 20                  | 0.219141       | 0.204126       | 0.209104       | 0.175015       | 0.172489       | 0.202208       |
| 22                  | 0.191882       | 0.175017       | 0.200284       | 0.202182       | 0.211508       | 0.218732       |
| 24                  | 0.204348       | 0.178696       | 0.199076       | 0.357289       | 0.281522       | 0.277712       |

Table S13: Relative mRNA expression *per2* – incubation with *E. coli*, strain BJ23

| <i>per2</i><br>BJ23 | Well A         |                |                | Well B         |                |                |
|---------------------|----------------|----------------|----------------|----------------|----------------|----------------|
| hours               | Replicate<br>1 | Replicate<br>2 | Replicate<br>3 | Replicate<br>1 | Replicate<br>2 | Replicate<br>3 |
| 2                   | 0.418233       | 0.425247       | 0.492451       | 0.764761       | 0.758361       | 0.715877       |
| 4                   | 5.118074       | 7.188135       | 5.591332       | 0.153604       | 0.182042       | 0.15752        |
| 6                   | 0.417954       | 0.388305       | 0.382322       | 0.311365       | 0.298338       | 0.309443       |
| 8                   | 0.431634       | 0.350232       |                | 0.207989       | 0.154659       | 0.201642       |
| 10                  | 0.20206        | 0.218911       | 0.184533       | 0.190978       | 0.236092       | 0.192919       |
| 12                  | 0.290318       | 0.272962       | 0.299498       | 0.277189       | 0.254664       | 0.272645       |
| 14                  | 0.264472       | 0.32033        | 0.318423       | 0.250209       | 0.28132        | 0.225987       |
| 16                  | 0.122115       | 0.17464        | 0.155913       | 0.200994       | 0.31557        | 0.305732       |
| 18                  | 0.205949       | 0.202279       | 0.164269       | 0.114859       | 0.174343       | 0.159736       |
| 20                  | 0.280896       | 0.34502        | 0.20766        | 0.21557        | 0.127544       | 0.176596       |
| 22                  | 0.174562       | 0.189587       | 0.175263       |                |                |                |
| 24                  | 0.179401       | 0.161637       | 0.191277       | 0.219958       | 0.230312       | 0.253178       |

Table S14: Relative mRNA expression *per3* – incubation with no bacteria, control

| <i>per3</i><br>control | Well A         |                |                | Well B         |                |                |
|------------------------|----------------|----------------|----------------|----------------|----------------|----------------|
| hours                  | Replicate<br>1 | Replicate<br>2 | Replicate<br>3 | Replicate<br>1 | Replicate<br>2 | Replicate<br>3 |
| 2                      | 0.041451       | 0.040549       | 0.048466       | 0.083746       | 0.083746       | 0.076092       |
| 4                      | 0.064405       | 0.057736       | 0.065145       |                |                |                |
| 6                      | 0.152288       | 0.076877       | 0.077508       | 0.061598       | 0.061598       | 0.114986       |
| 8                      | 0.174933       | 0.094717       | 0.082969       | 0.127043       | 0.127043       | 0.123841       |
| 10                     | 0.035339       | 0.083963       | 0.037383       | 0.130651       | 0.130651       | 0.107978       |
| 12                     | 0.115906       | 0.075348       | 0.059822       | 0.052236       | 0.052236       | 0.035459       |
| 14                     |                |                |                |                |                |                |
| 16                     | 0.108861       | 0.071335       | 0.070367       | 0.089283       | 0.089283       | 0.085076       |
| 18                     | 0.074384       | 0.047532       | 0.037583       | 0.0553         | 0.0553         | 0.062795       |
| 20                     | 0.071822       | 0.063388       | 0.142297       | 0.047302       | 0.047302       | 0.070233       |
| 22                     | 0.053349       | 0.045249       | 0.087207       | 0.041519       | 0.041519       | 0.069586       |
| 24                     |                |                |                | 0.054562       | 0.054562       | 0.069524       |

Table S15: Relative mRNA expression *per3* – incubation with *E. coli*, strain BJ17

| <i>per3</i><br>BJ17 | Well A         |                |                | Well B         |                |                |
|---------------------|----------------|----------------|----------------|----------------|----------------|----------------|
| hours               | Replicate<br>1 | Replicate<br>2 | Replicate<br>3 | Replicate<br>1 | Replicate<br>2 | Replicate<br>3 |
| 2                   | 0.07458        | 0.070993       | 0.084692       |                |                |                |
| 4                   | 0.115317       | 0.087851       | 0.134538       | 0.066686       | 0.078328       | 0.078959       |
| 6                   | 0.057953       | 0.064758       | 0.087947       | 0.0492         | 0.128964       | 0.110034       |
| 8                   | 0.070075       | 0.104997       | 0.06951        | 0.075534       | 0.112917       | 0.077009       |
| 10                  | 0.081254       | 0.105734       | 0.111848       | 0.084555       | 0.068405       | 0.053465       |
| 12                  | 0.076174       | 0.074012       | 0.047935       | 0.080084       | 0.062261       | 0.038952       |
| 14                  |                |                |                | 0.067715       | 0.073117       | 0.093762       |
| 16                  | 0.02836        | 0.029417       | 0.037642       | 0.039073       | 0.062296       | 0.031188       |
| 18                  |                |                |                | 0.049988       | 0.047375       | 0.074307       |
| 20                  | 0.032822       | 0.03519        | 0.056933       | 0.032056       | 0.046154       | 0.039226       |
| 22                  | 0.081067       | 0.073078       | 0.078387       | 0.060978       | 0.062623       | 0.070301       |
| 24                  | 0.052453       | 0.060149       | 0.087801       | 0.096128       | 0.116901       | 0.077232       |

Table S16: Relative mRNA expression *per3* – incubation with *E. coli*, strain BJ23

| <i>per3</i><br>BJ23 | Well A         |                |                | Well B         |                |                |
|---------------------|----------------|----------------|----------------|----------------|----------------|----------------|
| hours               | Replicate<br>1 | Replicate<br>2 | Replicate<br>3 | Replicate<br>1 | Replicate<br>2 | Replicate<br>3 |
| 2                   | 0.072096       | 0.05902        | 0.12614        |                |                |                |
| 4                   | 0.239206       | 1.076796       | 0.348067       | 0.049521       | 0.041726       | 0.016889       |
| 6                   | 0.097104       | 0.067207       | 0.089394       | 0.059014       | 0.0698         | 0.093201       |
| 8                   | 0.114328       | 0.079412       | 0.129397       |                |                |                |
| 10                  | 0.126219       | 0.114349       | 0.133511       | 0.094959       | 0.080117       | 0.073022       |
| 12                  | 0.056818       | 0.069485       | 0.042524       | 0.033876       | 0.029084       | 0.067361       |
| 14                  | 0.077753       | 0.076692       | 0.065331       | 0.127014       | 0.045335       | 0.110708       |
| 16                  | 0.041142       | 0.059932       | 0.041999       | 0.111957       | 0.079159       | 0.073515       |
| 18                  | 0.06404        | 0.056336       | 0.096742       | 0.052325       | 0.058905       | 0.036814       |
| 20                  | 0.07768        | 0.030891       | 0.081516       | 0.060757       | 0.055562       | 0.066895       |
| 22                  | 0.054397       | 0.067671       | 0.075712       | 0.033856       | 0.060394       | 0.050869       |
| 24                  | 0.054858       | 0.075192       | 0.066212       | 0.080951       | 0.041007       | 0.100305       |

Table S17: Relative mRNA expression *cry1* – incubation with no bacteria, control

| <i>cry1</i><br>control | Well A         |                |                | Well B         |                |                |
|------------------------|----------------|----------------|----------------|----------------|----------------|----------------|
| hours                  | Replicate<br>1 | Replicate<br>2 | Replicate<br>3 | Replicate<br>1 | Replicate<br>2 | Replicate<br>3 |
| 2                      | 0.350822       | 0.26696        | 0.338822       | 0.297995       | 0.303341       | 0.305197       |
| 4                      | 0.152523       | 0.214736       | 0.201216       | 0.27957        | 0.187275       | 0.17686        |
| 6                      | 0.33171        | 0.228365       | 0.262786       | 0.305015       | 0.278515       | 0.272991       |
| 8                      | 0.230289       | 0.279128       | 0.298782       | 0.232265       | 0.232854       | 0.225003       |
| 10                     | 0.250128       | 0.310376       | 0.23463        | 0.323316       | 0.252998       | 0.260084       |
| 12                     | 0.274708       | 0.260689       | 0.246916       | 0.23642        | 0.223272       | 0.250254       |
| 14                     | 0.216007       | 0.234276       | 0.203309       | 0.247386       | 0.251386       | 0.218386       |
| 16                     | 0.309263       | 0.336316       | 0.270802       | 0.257094       | 0.295757       | 0.281535       |
| 18                     | 0.250392       | 0.203558       | 0.276872       | 0.321279       | 0.476495       | 0.314859       |
| 20                     | 0.24193        | 0.226163       | 0.19577        | 0.203813       | 0.225196       | 0.212404       |
| 22                     | 0.197373       | 0.180664       | 0.182085       | 0.172373       | 0.209018       | 0.236517       |
| 24                     | 0.141589       | 0.193217       | 0.159221       | 0.170665       | 0.210278       | 0.184556       |

Table S18: Relative mRNA expression *cry1* – incubation with *E. coli*, strain BJ17

| <i>cry1</i><br>BJ17 | Well A         |                |                | Well B         |                |                |
|---------------------|----------------|----------------|----------------|----------------|----------------|----------------|
| hours               | Replicate<br>1 | Replicate<br>2 | Replicate<br>3 | Replicate<br>1 | Replicate<br>2 | Replicate<br>3 |
| 2                   | 0.209996       | 0.239082       | 0.229691       | 0.258866       | 0.268283       | 0.298059       |
| 4                   | 0.211136       | 0.205408       | 0.201293       | 0.11475        | 0.200112       | 0.185939       |
| 6                   | 0.237931       | 0.207913       | 0.207356       | 0.238833       | 0.29296        | 0.223151       |
| 8                   | 0.220522       | 0.213999       | 0.221983       | 0.298375       | 0.209374       | 0.26723        |
| 10                  | 0.24491        | 0.235922       | 0.272581       | 0.173485       | 0.2304         | 0.225721       |
| 12                  | 0.196008       | 0.197971       | 0.219418       | 0.194486       | 0.218066       | 0.199696       |
| 14                  | 0.184138       | 0.178655       | 0.184684       | 0.214856       | 0.184861       | 0.224382       |
| 16                  | 0.179382       | 0.170588       | 0.205794       | 0.262442       | 0.222977       | 0.257366       |
| 18                  | 0.293545       | 0.24022        | 0.244909       | 0.203905       | 0.263808       | 0.208748       |
| 20                  | 0.208111       | 0.207308       | 0.201828       | 0.247752       | 0.260542       | 0.304745       |
| 22                  | 0.226507       | 0.229972       | 0.209577       | 0.184266       | 0.218009       | 0.226171       |
| 24                  | 0.177854       | 0.206937       | 0.200943       | 0.226984       | 0.200294       | 0.216398       |

Table S19: Relative mRNA expression *cry1* – incubation with *E. coli*, strain BJ23

| <i>cry1</i><br>BJ23 | Well A         |                |                | Well B         |                |                |
|---------------------|----------------|----------------|----------------|----------------|----------------|----------------|
| hours               | Replicate<br>1 | Replicate<br>2 | Replicate<br>3 | Replicate<br>1 | Replicate<br>2 | Replicate<br>3 |
| 2                   | 0.300021       | 0.336656       | 0.258498       | 1.325429       | 0.274471       | 0.326074       |
| 4                   | 3.142712       | 4.639763       | 4.345631       | 0.192495       | 0.226541       | 0.194349       |
| 6                   | 0.230762       | 0.254967       | 0.262719       | 0.198733       | 0.207293       | 0.193465       |
| 8                   | 0.203609       | 0.182332       | 0.230425       | 0.247588       | 0.234673       | 0.295716       |
| 10                  | 0.240869       | 0.225943       | 0.227739       | 0.22265        | 0.221712       | 0.247584       |
| 12                  | 0.259613       | 0.237888       | 0.290907       | 0.215371       | 0.202777       | 0.189769       |
| 14                  | 0.190085       | 0.198579       | 0.225461       | 0.289695       | 0.231546       | 0.256954       |
| 16                  | 0.23572        | 0.243865       | 0.19355        | 0.209693       | 0.204903       | 0.322514       |
| 18                  | 0.218685       | 0.217262       | 0.266352       | 0.209852       | 0.203934       | 0.240139       |
| 20                  | 0.297727       | 0.326955       | 0.185321       | 0.16762        | 0.242703       | 0.204803       |
| 22                  | 0.193292       | 0.183561       | 0.133219       | 0.151271       | 0.195994       | 0.180319       |
| 24                  | 0.158244       | 0.147606       | 0.129125       | 0.20384        | 0.178161       | 0.194113       |

Table S20: Relative mRNA expression *cry2* – incubation with no bacteria, control

| <i>cry2</i><br>control | Well A         |                |                | Well B         |                |                |
|------------------------|----------------|----------------|----------------|----------------|----------------|----------------|
| hours                  | Replicate<br>1 | Replicate<br>2 | Replicate<br>3 | Replicate<br>1 | Replicate<br>2 | Replicate<br>3 |
| 2                      | 0.571484       | 0.564851       | 0.476913       | 0.49182        | 0.405912       | 0.526495       |
| 4                      | 0.517          | 0.408531       | 0.395807       | 0.515433       | 0.444042       | 0.422949       |
| 6                      | 0.636187       | 0.559175       | 0.55571        | 0.377296       | 0.560807       | 0.434739       |
| 8                      | 0.526453       | 0.474245       | 0.503471       | 0.362798       | 0.361071       | 0.396516       |
| 10                     | 0.54412        | 0.646968       | 0.487801       | 0.636636       | 0.529304       | 0.56155        |
| 12                     | 0.495028       | 0.48511        | 0.472214       | 0.342263       | 0.358669       | 0.35455        |
| 14                     | 0.459674       | 0.489329       | 0.351444       | 0.56713        | 0.484534       | 0.519105       |
| 16                     | 0.443773       | 0.480936       | 0.52121        | 0.351631       | 0.379488       | 0.403786       |
| 18                     | 0.304811       | 0.330988       | 0.314878       | 0.293368       | 0.244023       | 0.424322       |
| 20                     | 0.355504       | 0.302732       | 0.360104       | 0.285092       | 0.281195       | 0.323385       |
| 22                     | 0.374048       | 0.271296       | 0.297112       | 0.263168       | 0.283535       | 0.416696       |
| 24                     | 0.252469       | 0.301427       | 0.274018       |                |                |                |

Table S21: Relative mRNA expression *cry2* – incubation with *E. coli*, strain BJ17

| <i>cry2</i><br>BJ17 | Well A         |                |                | Well B         |                |                |
|---------------------|----------------|----------------|----------------|----------------|----------------|----------------|
| hours               | Replicate<br>1 | Replicate<br>2 | Replicate<br>3 | Replicate<br>1 | Replicate<br>2 | Replicate<br>3 |
| 2                   | 0.454196       | 0.418915       | 0.380765       | 0.533123       | 0.422942       | 0.577737       |
| 4                   | 0.477771       | 0.399625       | 0.389377       | 0.333711       | 0.430596       | 0.37195        |
| 6                   | 0.46115        | 0.382201       | 0.453084       | 0.551001       | 0.59366        | 0.616618       |
| 8                   | 0.43797        | 0.442253       | 0.454987       | 0.615591       | 0.495495       | 0.557812       |
| 10                  | 0.449664       | 0.404247       | 0.452429       | 0.403736       | 0.377535       | 0.353859       |
| 12                  | 0.356665       | 0.393694       | 0.404553       | 0.350346       | 0.369331       | 0.363771       |
| 14                  | 0.364286       | 0.307635       | 0.269002       | 0.497351       | 0.492497       | 0.317452       |
| 16                  | 0.322861       | 0.319686       | 0.31204        | 0.371488       | 0.326508       | 0.321153       |
| 18                  | 0.34254        | 0.461803       | 0.44109        | 0.330915       | 0.358653       | 0.329948       |
| 20                  | 0.369223       | 0.389363       | 0.292358       | 0.352602       | 0.3844         | 0.337136       |
| 22                  | 0.358507       | 0.347367       | 0.33906        | 0.311291       | 0.286283       | 0.234309       |
| 24                  | 0.339433       | 0.256955       | 0.33089        | 0.395707       | 0.408344       | 0.417961       |

Table S22: Relative mRNA expression *cry2* – incubation with *E. coli*, strain BJ23

| <i>cry2</i><br>BJ23 | Well A         |                |                | Well B         |                |                |
|---------------------|----------------|----------------|----------------|----------------|----------------|----------------|
| hours               | Replicate<br>1 | Replicate<br>2 | Replicate<br>3 | Replicate<br>1 | Replicate<br>2 | Replicate<br>3 |
| 2                   | 0.575506       | 0.590416       | 0.551774       | 0.550604       | 0.633364       | 0.664927       |
| 4                   | 6.31421        | 7.432243       | 5.560975       | 0.400728       | 0.452797       | 0.411873       |
| 6                   | 0.397963       | 0.3457         | 0.406523       | 0.304072       | 0.34346        | 0.321954       |
| 8                   | 0.328132       | 0.308774       | 0.33778        | 0.541804       | 0.521422       | 0.504282       |
| 10                  | 0.427272       | 0.468121       | 0.400368       | 0.36774        | 0.328427       | 0.327492       |
| 12                  | 0.489548       | 0.425195       | 0.480572       | 0.420651       | 0.351923       | 0.359105       |
| 14                  | 0.455003       | 0.428634       | 0.423243       | 0.467251       | 0.462588       | 0.381364       |
| 16                  | 0.343661       | 0.395674       | 0.367322       | 0.353744       | 0.37236        | 0.370892       |
| 18                  | 0.34652        | 0.30709        | 0.237344       | 0.45087        | 0.324653       | 0.246117       |
| 20                  | 0.372318       | 0.290509       | 0.342773       | 0.34132        | 0.25516        | 0.262914       |
| 22                  | 0.298126       | 0.309702       | 0.307737       | 0.363982       | 0.338916       | 0.329334       |
| 24                  | 0.277729       | 0.270156       | 0.25661        | 0.313233       | 0.324874       | 0.313148       |



**Table S23.** Comparison of circadian behaviour of core clock gene expression in HepG2 cells (K) in co-culture with *E. coli* strains BJ17 and BJ23, related to Figure 2. The statistically significant changes are shown in bold.

| Gene, comparison | Model significance, adjusted p-value | Amplitude change (a.u.) | Amplitude change, adjusted p-value | Phase shift (radians) | Phase shift (hours) | Phase shift, adjusted p-value |
|------------------|--------------------------------------|-------------------------|------------------------------------|-----------------------|---------------------|-------------------------------|
| CLOCK, BJ17:K    | 1.16E-01                             | 4.18E-02                | 1.89E-01                           | -0.05                 | 0.20                | 9.74E-01                      |
| CLOCK, BJ23:K    | 5.16E-02                             | 6.08E-02                | 1.17E-01                           | -0.50                 | 1.90                | 9.74E-01                      |
| BMA1L, BJ17:K    | 2.65E-03                             | 2.40E-02                | 1.74E-01                           | -0.11                 | 0.44                | 9.74E-01                      |
| BMAL1, BJ23:K    | 1.08E-03                             | 5.67E-02                | 9.84E-02                           | -0.23                 | 0.87                | 9.74E-01                      |
| PER1, BJ17:K     | 6.14E-07                             | -1.28E-01               | <b>2.66E-04</b>                    | 3.19                  | -12.17              | 9.74E-01                      |
| PER1, BJ23:K     | 7.73E-05                             | -8.54E-02               | 8.53E-02                           | 0.05                  | -0.18               | 9.74E-01                      |
| PER2, BJ17:K     | 3.99E-12                             | 3.81E-02                | <b>1.93E-02</b>                    | 0.57                  | -2.19               | 1.48E-01                      |
| PER2, BJ23:K     | 2.20E-04                             | 4.19E-02                | 1.39E-01                           | 0.95                  | -3.62               | 1.48E-01                      |
| PER3, BJ17:K     | 8.77E-06                             | 7.50E-03                | 2.55E-01                           | 1.11                  | -4.23               | <b>4.07E-02</b>               |
| PER3, BJ23:K     | 1.11E-02                             | 7.98E-03                | 4.37E-01                           | 0.88                  | -3.37               | 2.69E-01                      |
| CRY1, BJ17:K     | 1.31E-03                             | -1.65E-02               | 1.50E-01                           | 2.29                  | -8.77               | 1.48E-01                      |
| CRY1, BJ23:K     | 5.19E-01                             | 6.52E-03                | 7.96E-01                           | 1.84                  | -7.03               | 1.48E-01                      |
| CRY2, BJ17:K     | 5.81E-13                             | -2.60E-02               | 1.89E-01                           | 0.50                  | -1.90               | 1.48E-01                      |
| CRY2, BJ23:K     | 2.30E-09                             | -4.55E-02               | 9.23E-02                           | 0.38                  | -1.46               | 4.30E-01                      |

**Table S24.** Final dilutions of the bacterial culture in growth curve experiments, related to Bacterial Growth Curves.

| Time point | Final dilution on LB plates         |
|------------|-------------------------------------|
| 0          | 10 <sup>-3</sup> – 10 <sup>-5</sup> |
| 1          | 10 <sup>-3</sup> – 10 <sup>-6</sup> |
| 2          | 10 <sup>-4</sup> – 10 <sup>-6</sup> |
| 3          | 10 <sup>-5</sup> – 10 <sup>-7</sup> |
| 4          | 10 <sup>-5</sup> – 10 <sup>-8</sup> |
| 5          | 10 <sup>-6</sup> – 10 <sup>-8</sup> |
| 6          | 10 <sup>-6</sup> – 10 <sup>-8</sup> |
| 7          | 10 <sup>-6</sup> – 10 <sup>-8</sup> |

**Table S25.** List of used primers for RT-PCR, related to RNA isolation and RT-PCR analysis.

| Primer                   | Primer sequence (5' → 3') | Reference          |
|--------------------------|---------------------------|--------------------|
| CLOCK <sub>fw</sub>      | TGCGAGGAACAATAGACCCAA     | (Luo et al., 2016) |
| CLOCK <sub>rev</sub>     | ATGGCCTATGTGTGCGTTGTA     | (Luo et al., 2016) |
| BMAL1 <sub>fw</sub>      | AAGGGAAGCTCACAGTCAGAT     | (Luo et al., 2016) |
| BMAL1 <sub>rev</sub>     | GGACATTGCGTTGCATGTTGG     | (Luo et al., 2016) |
| CRY1 <sub>fw</sub>       | CTCCTCCAATGTGGGCATCAA     | (Luo et al., 2016) |
| CRY1 <sub>rev</sub>      | CCACGAATCACAAACAGACGG     | (Luo et al., 2016) |
| CRY2 <sub>fw</sub>       | TCCCAAGGCTGTTCAAGGAAT     | This study         |
| CRY2 <sub>rev</sub>      | TGCATCCCGTCTTTCCCAA       | This study         |
| PER1 <sub>fw</sub>       | CTACGGCATGTGCACAGTAGA     | This study         |
| PER1 <sub>rev</sub>      | GTGTGTACTCAGACGTGATGTG    | This study         |
| PER2 <sub>fw</sub>       | GACATGAGACCAACGAAAACCTGC  | (Luo et al., 2016) |
| PER2 <sub>rev</sub>      | AGGCTAAAGGTATCTGGACTCTG   | (Luo et al., 2016) |
| PER3 <sub>fw</sub>       | GCAGAGGAAATTGGCGGACA      | (Luo et al., 2016) |
| PER3 <sub>rev</sub>      | GGTTTATTGCGTCTCTCCGAG     | (Luo et al., 2016) |
| RPLP0 <sub>fw</sub> *    | TGCATCAGTACCCATTCTATCA    | This study         |
| RPLP0 <sub>rev</sub> *   | AAG?TGTAATCCGTCTCCACAGA   | This study         |
| β-AKTIN <sub>fw</sub> *  | TCCTCTCCCAAGTCCACACAGG    | This study         |
| β-AKTIN <sub>rev</sub> * | GGGCACGAAGGCTCATCATTC     | This study         |
| IL6 <sub>Rfw</sub>       | CCCCTCAGCAATGTTGTTTGT     | (Wu et al., 2017)  |
| IL6 <sub>Rrev</sub>      | CTCCGGGACTGCAACTGG        | (Wu et al., 2017)  |
| TNF <sub>fw</sub>        | CCTCTCTAATCAGCCCTCTG      | (Li et al., 2016)  |
| TNF <sub>rev</sub>       | GAGGACCTGGGAGTAGATGAG     | (Li et al., 2016)  |

\* For housekeeping genes

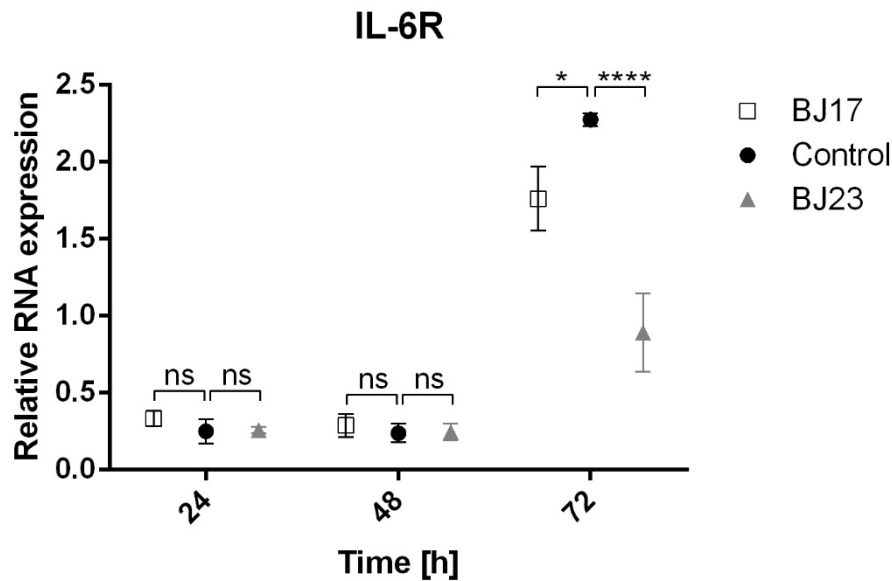

**Figure S2:** Relative expression of the IL-6R genes as a function of time (24–72 hours). BJ17 (white squares), BJ23 (grey triangles) – co-cultures of BJ strain with the HepG2 cells. Control (black circles) – HepG2 cells without bacteria. Statistically significant results were presented; not significant (ns) for  $P > 0.05$ , \* for  $P \leq 0.05$ , \*\* for  $P \leq 0.01$ , \*\*\* for  $P \leq 0.001$  and \*\*\*\* for  $P \leq 0.0001$ . Data are represented as mean  $\pm$  SD of two separate experiments.

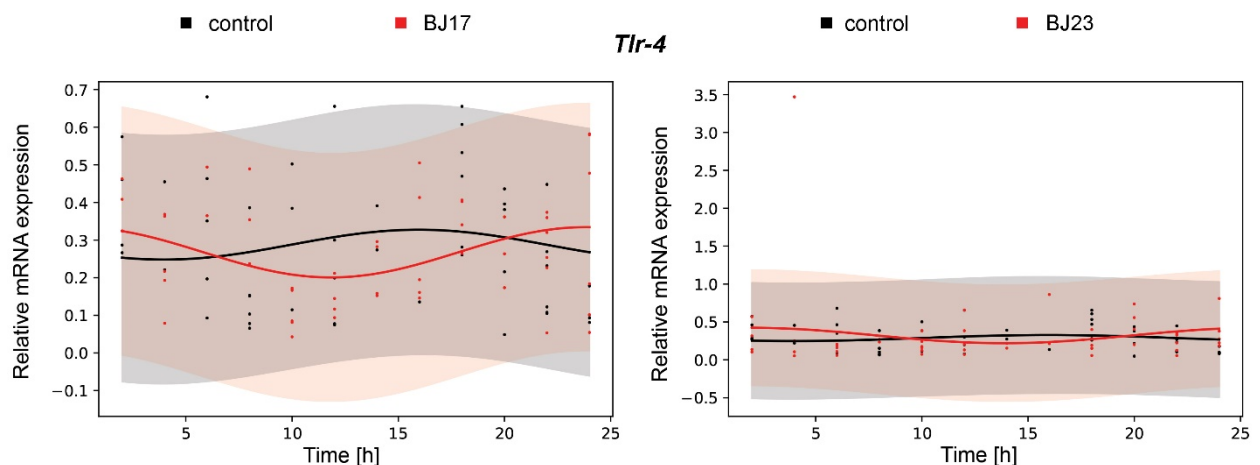

**Figure S3:** Comparison of circadian behaviour of core clock gene expression between the co-cultures and control. The figures represent the relative RNA expression of the TLR4 genes as a function of time (2–24 hours) in HepG2 cells (K, black dots and lines, respectively) and in HepG2 cell co-cultures with *E. coli* strains BJ17 and BJ23 (red dots and lines, respectively). The experimental results, obtained in two separate experiments are represented with dots, and the fitted cosinor curves with solid lines.

#### References in Supplementary Files

- Li, X., Wang, S., Zhu, R., Li, H., Han, Q., Zhao, R.C., 2016. Lung tumor exosomes induce a pro-inflammatory phenotype in mesenchymal stem cells via NF $\kappa$ B-TLR signaling pathway. *J. Hematol. Oncol.* 9, 1–12. <https://doi.org/10.1186/s13045-016-0269-y>
- Luo, W., Ma, S., Yang, Y., Wang, C., Zhang, D., Zhang, Q., Liu, Y., Liu, Z., 2016. TFEB regulates PER3 expression via glucose-dependent effects on CLOCK/BMAL1. *Int. J. Biochem. Cell Biol.* 78, 31–42. <https://doi.org/10.1016/j.biocel.2016.06.020>
- Wu, Y.S., Chung, I., Wong, W.F., Masamune, A., Sim, M.S., Looi, C.Y., 2017. Paracrine IL-6 signaling mediates the effects of pancreatic stellate cells on epithelial-mesenchymal transition via Stat3/Nrf2 pathway in pancreatic cancer cells. *Biochim. Biophys. Acta - Gen. Subj.* 1861, 296–306. <https://doi.org/10.1016/j.bbagen.2016.10.006>
